# Supplementary material for: Trajectory Optimization in Robotic Applications, Survey of Recent Developments
Source: Preprints.org preprint supplement (doi:10.20944/preprints202105.0281.v1), 2021-05-13
Supplement: Supplementary file 3 [file supplementary]

## Sheet: Sheet1
		Stationary Robots	Wheeled Robots	Legged Robots	Swarm Robots	Medical Robots	Space Robots	Service Robots	Flying Robot	Industrial Robots	Min energy consumed	Min execution time	Min the Jerk	Min the Path length	Min Joint rotation	Min Fuel Consumed	Max obstacle Clear	Joint Motor torque	Joint Angle	Joint Velocity	Joint Acceleration	Joint position	Joint Jerk	Joint Velocity	Joint Acceleration	Jerk constraints	Dynamic Constraint	Holonomic Constraint	Joint Torque	joint position	SQP	Genetic algorithm	Dynamic Programing	PSO	Artificial Bee Colony	Ant Colony	Simulated anneling	Calculas of variation	Bacterial foraging	Matlab	Robot Studio	PSOPT simulator	PUMA Simulator	Delmia Simulator	3DCreate simulator	ACCADO Simulator	FEM simulator	C++	Salesman model
	Author	SYSTEM APPLICATION									OBJECTIVES							VARIABLES						CONSTRAINTS							OPTIMIZATION ALGORITHM									SIMULATION PLATFORM									ANALYSIS METHOD
	Haddad et al		X									X						X	X					X	X			X									X
	Gasparetto et al	X										X	X							X	X		X	X	X	X	X				X
	Gilimyanov et al		X											X				X	X					X	X						X
	Gasparetto et al									X	X	X	X					X	X	X				X	X
	Celeste et al		X					X						X					X		X	X					X
	Gasparetto et al									X		X	X							X	X		X	X	X						X
	Sridhar et al								X							X											X	X					X
	Gregory et al	X									X							X	X					X	X		X	X										X
	Mellinger et al								X			X															X	X					X
	Koch et al			X							X								X	X	X			X	X		X						X
	Kala et al	X										X															X						X
	Abu-Dakka et al									X		X						X	X					X	X	X	X					X																X
	Chen et al							X			X	X						X									X	X					X							X
	Aoustin et al			X										X					X	X							X	X
	Lim et al			X								X							X	X	X			X	X		X						X
	Kherici et al			X								X							X	X							X							X
	Shareef et al	X										X												X	X				X				X							X
	Števo et al	X									X	X							X	X				X	X							X
	Paes et al									X	X							X	X					X	X		X				X										X					X
	Vale et al		X								X							X									X	X
	SHEHATA et al		X									X						X	X								X	X				X								X
	Li et al		X									X						X	X						X			X	X											X
	Menasri et al	X												X					X								X			X		X
	Hehn et al								X					X						X	X						X	X
	Jin et al								X			X												X	X		X		X									X		X
	Gupta et al					X								X						X		X					X			X					X
	Suebsaiprom et al							X						X								X					X									X
	Sarkar et al			X										X					X	X		X					X					X
	Sun et al			X										X										X	X		X
	Oleiwi et al				X							X		X					X	X	X						X	X	X					X
	Ulrich et al									X	X	X		X					X		X			X	X	X										X									X				X
	Hossain et al		X											X					X	X							X	X	X										X
	Pellegrinelli et al	X									X		X					X	X	X				X	X					X	X									X
	Mo et al									X		X		X					X	X	X			X	X				X					X
	Wang et al	X														X		X									X		X					X
	Zhong et al			X										X					X	X				X	X
	Zhong et al		X								X	X								X	X						X		X				X
	Walambe et al		X									X		X				X	X					X	X		X													X
	Kalmár		X									X						X	X	X							X	X	X
	Böck et al	X										X							X	X				X	X		X				X											X
	Wu et al	X											X					X											X	X		X
	Cao et al	X									X	X						X		X							X							X
	Gleeson et al									X	X							X	X	X	X			X	X		X				X
	Das et al				X									X					X			X												X
	Chen et al			X										X					X	X							X		X		X
	Das et al				X									X						X		X												X
	Abele et al									X		X	X					X		X	X								X	X	X
	Roy et al	X										X		X					X	X				X	X				X			X								X
	Cirillo et al			X										X					X	X	X	X		X	X		X				X
	Pandey et al					X								X						X	X			X	X		X					X
	Hassan et al	X										X		X					X	X					X		X
	Kucuk	X										X								X	X					X				X				X									X
	Elshabasy et al	X									X							X	X								X		X		X	X								X
	Valente et al									X		X	X					X	X				X	X		X	X		X		X
	Jiang et al					X						X						X	X	X				X	X					X	X
	De Magistris et al			X				X			X	X							X	X											X																X
	Chu et al						X									X		X									X		X
	Suebsaiprom et al							X						X				X	X								X	X						X
	Mac et al		X									X		X				X									X		X					X
	Asma et al				X									X						X	X						X	X						X
	Gadaleta et al									X	X							X	X	X							X		X															X
	Baghli et al	X												X					X	X	X						X	X	X	X						X				X
	Liu et al	X										X							X	X				X	X				X
	Glorieux et al				X							X		X						X	X						X	X	X					X
[truncated: 7 more columns]
